# Supplementary material for: Microfiber-reinforced nanofibrous scaffolds with structural and material gradients to mimic ligament-to-bone interface
Source: Royal Society of Chemistry journal article supplement (doi:10.1039/c7tb02089a), 2017-01-01
Supplement: c7tb02089a1.pdf [file c7tb02089a1.pdf]

## Supporting Information

### Microfiber-reinforced Nanofibrous Scaffolds with Structure and Material Gradients to Mimic Ligament-to-bone Interface

Jiankang He \*, Nan Jiang, Ting Qin, Weijie Zhang, Zhuo Liu, Yaxiong Liu and Dichen Li

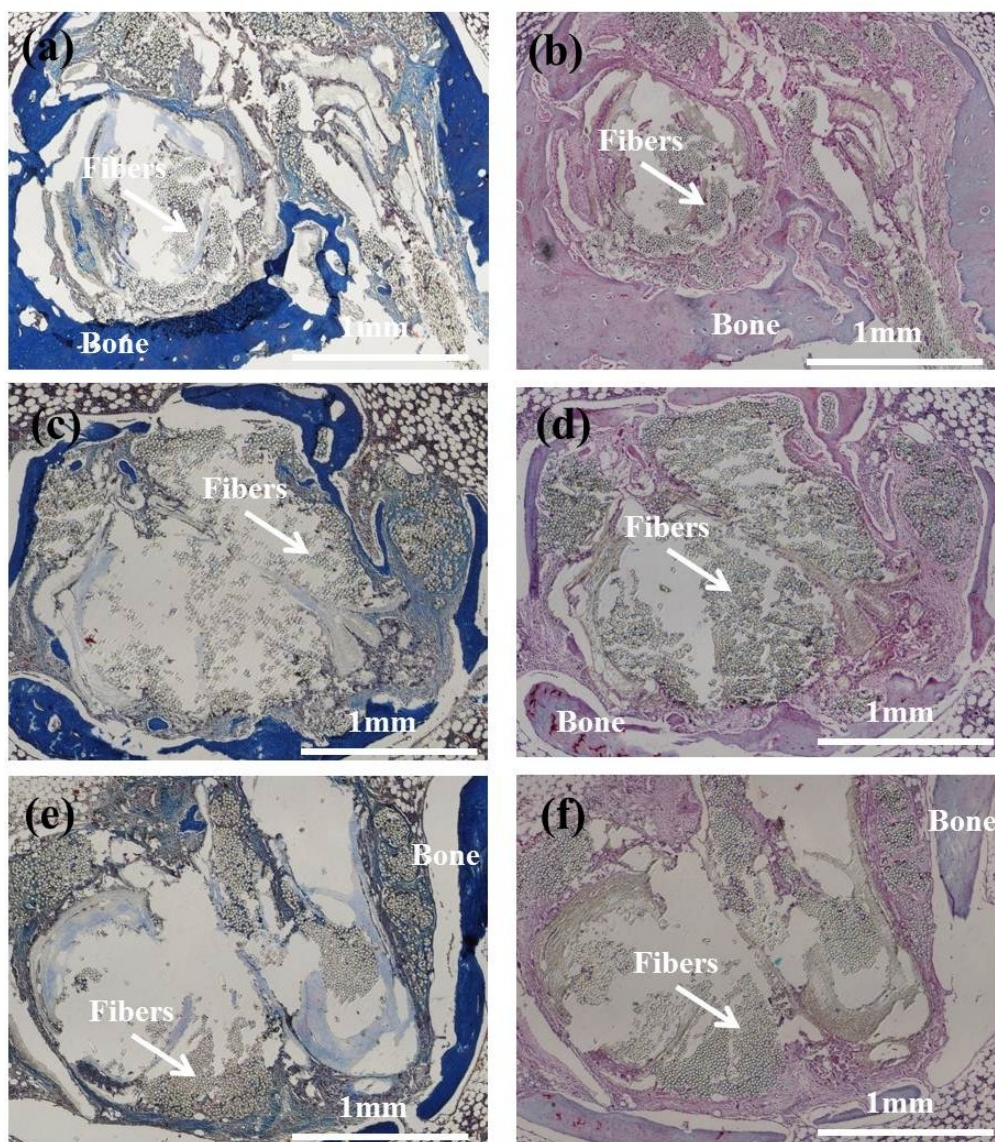

**Figure S1** Histological images of transverse sections of the regenerated grafts in the tibial tunnel after implantation for 3 months. (a-b) Masson and Safranin O-Fast Green stains of the transverse sections at proximal region of the tibial tunnel, (c-d) Masson and Safranin O-Fast Green stains of the transverse sections at middle region of the tibial tunnel, (e-f) Masson and Safranin O-Fast Green stains of the transverse sections at distal region of the tibial tunnel.
